# Supplementary material for: TNF-α contributes to sarcopenia through caspase-8/caspase-3/GSDME-mediated pyroptosis
Source: PubMed Central journal article supplement (PMC9950087; doi:10.1038/s41420-023-01365-6), 2023-02-24

## Original western blots

Figure 1G  
immunoblot of TNF- $\alpha$

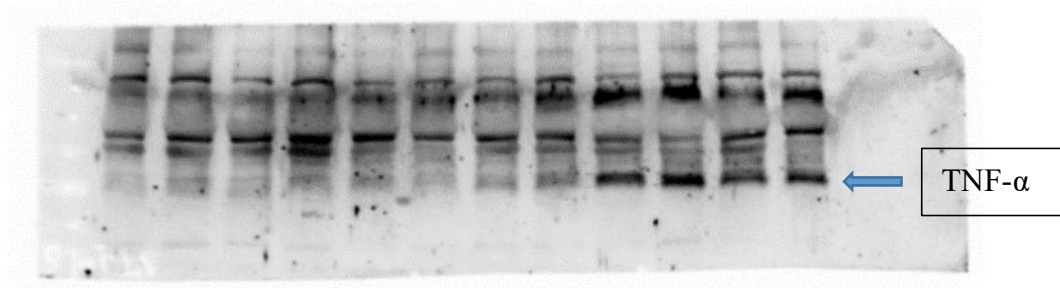

immunoblot of GAPDH

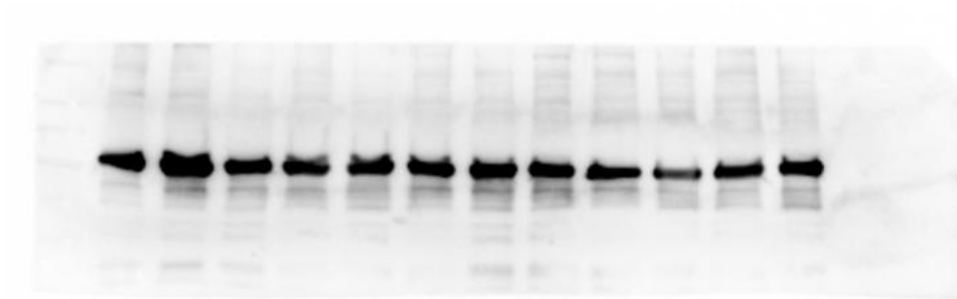

Figure2A  
immunoblot of GSDMD and GSDMD-N

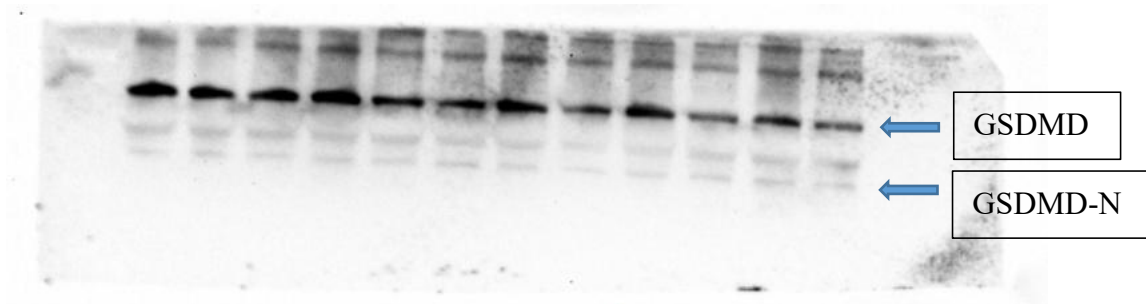

immunoblots of GAPDH of GSDMD

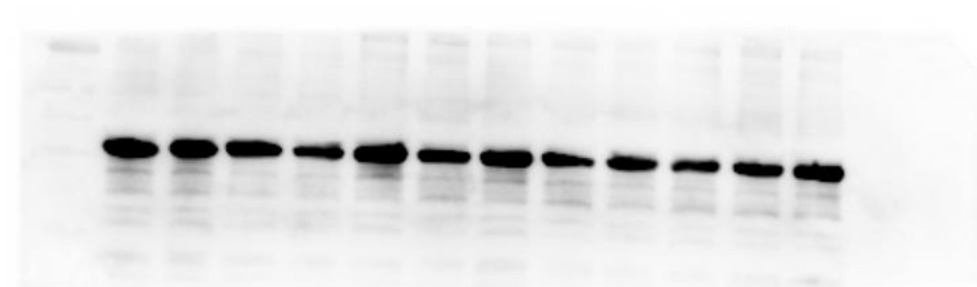

immunoblot of GSDME and GSDME-N

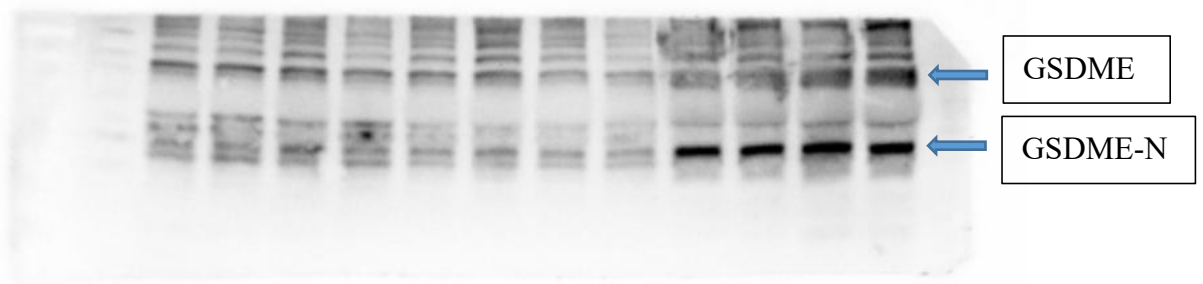

immunoblot of GAPDH of GSDME

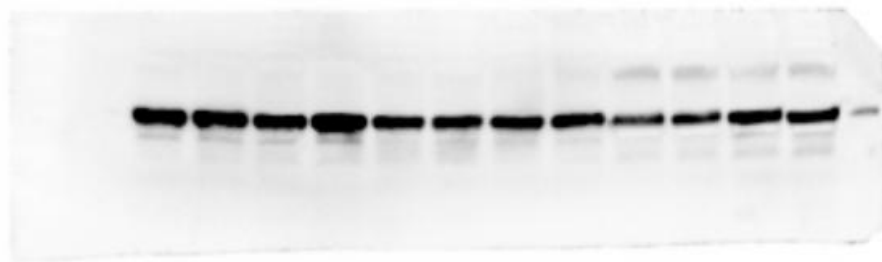

immunoblot of caspase-8 and cleaved-caspase-8

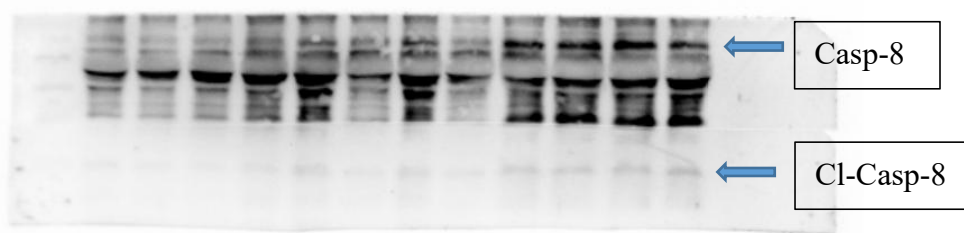

immunoblot of cleaved-caspase-8

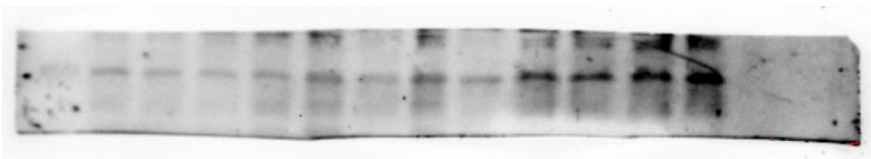

immunoblot of GAPDH of caspase-8

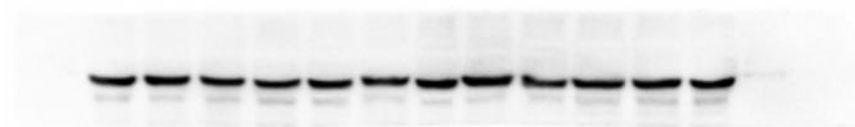

immunoblot of caspase-3 and cleaved-caspase-3

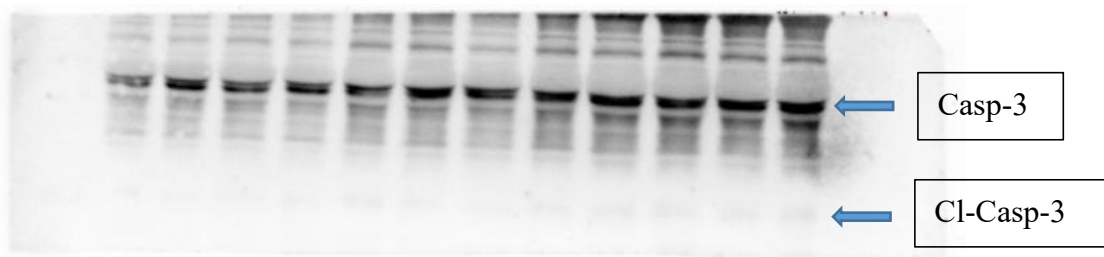

immunoblot of cleaved-caspase-3

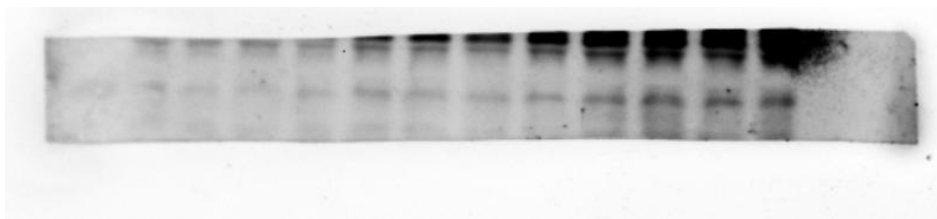

immunoblot of GAPDH of caspase-3

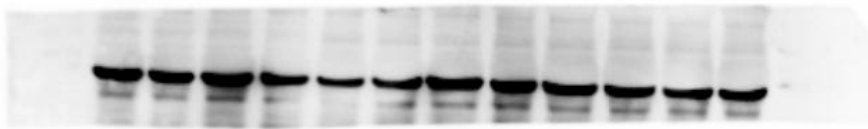

Figure3E

immunoblot of GSDME and GSDME-N

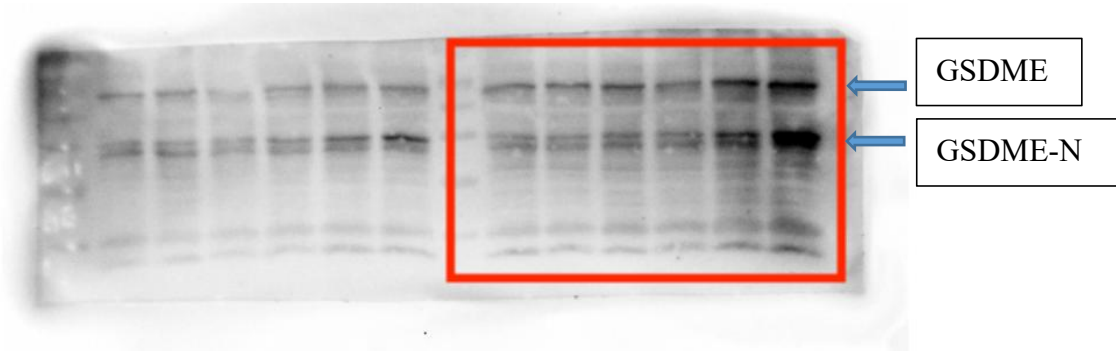

immunoblot of  $\beta$ -actin

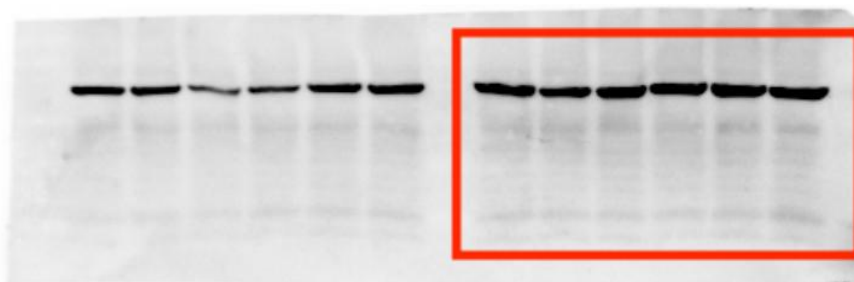

Figure 3F  
immunoblot of GSDME and GSDME-N

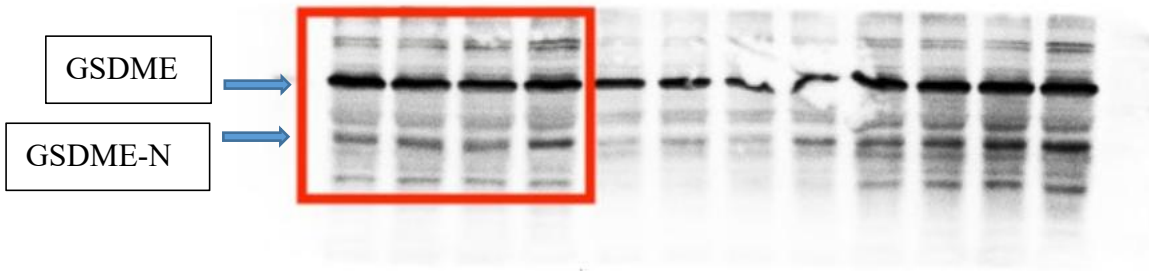

immunoblot of  $\beta$ -actin

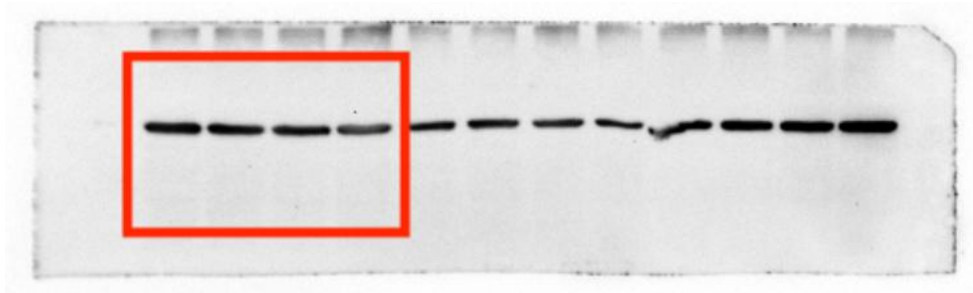

Figure 3G  
immunoblot of GSDME and GSDME-N

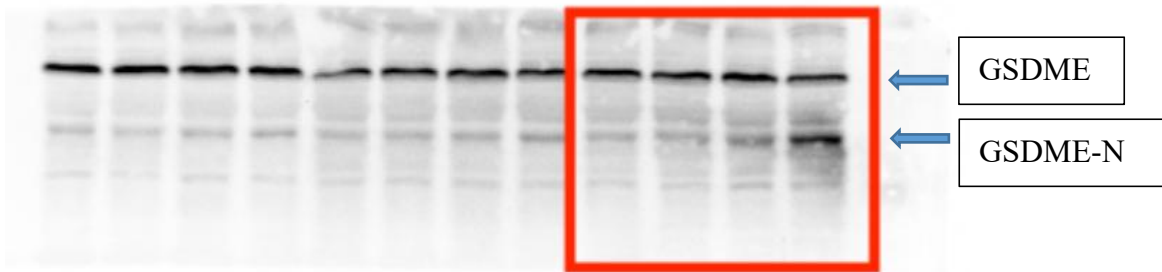

immunoblot of  $\beta$ -actin

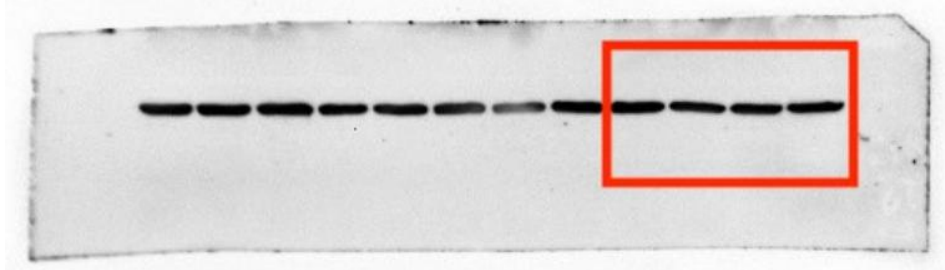

Figure 4A  
immunoblot of caspase-8 and cleaved-caspase-8

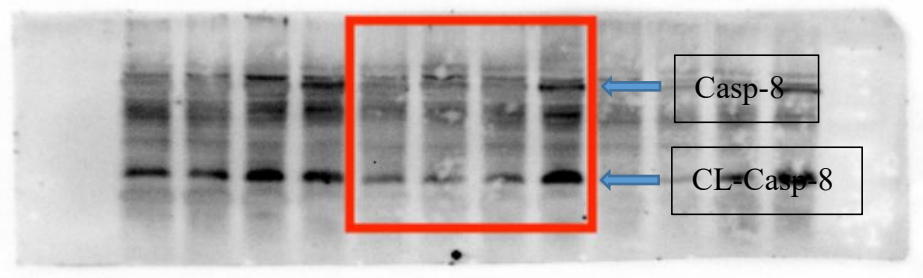

immunoblot of  $\beta$ -Tubulin

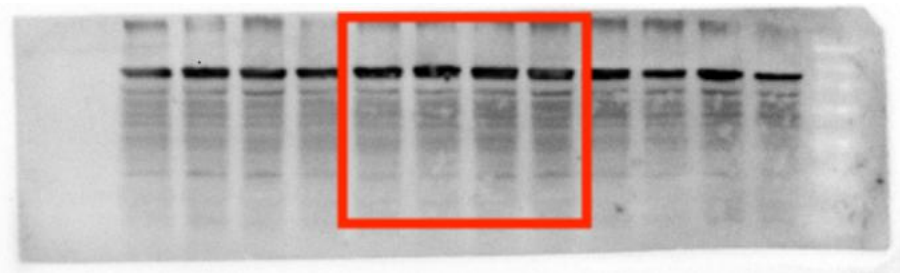

Figure 4B

immunoblot of GSDME and GSDME-N

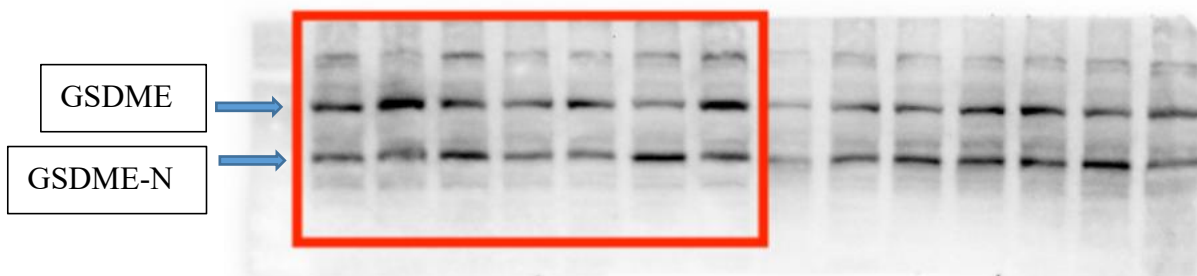

immunoblot of GAPDH of GSDME

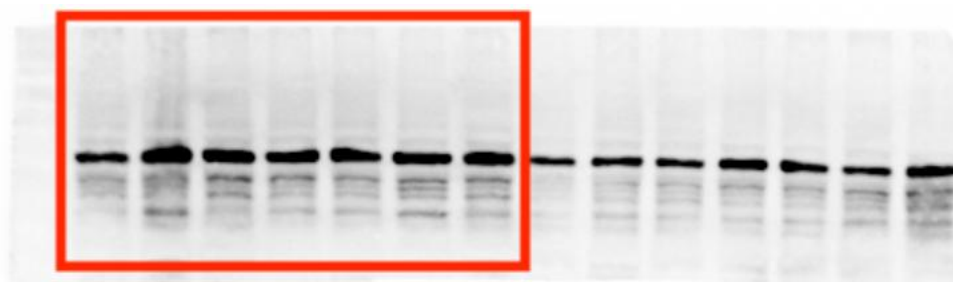

immunoblot of caspase-3 and cleaved-caspase-3

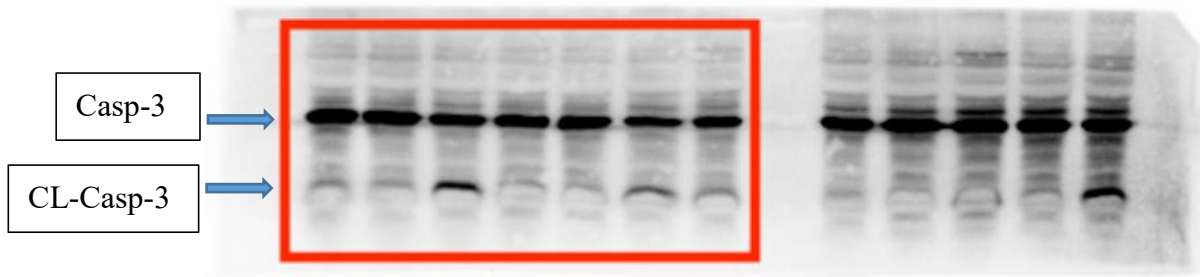

immunoblot of GAPDH of caspase-3

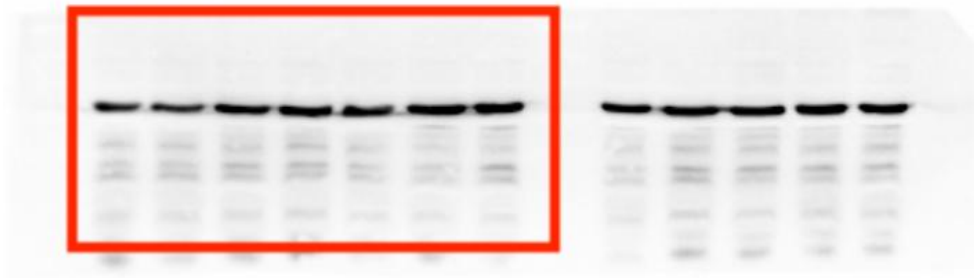

Figure 5A

immunoblot of caspase-3 and cleaved-caspase-3

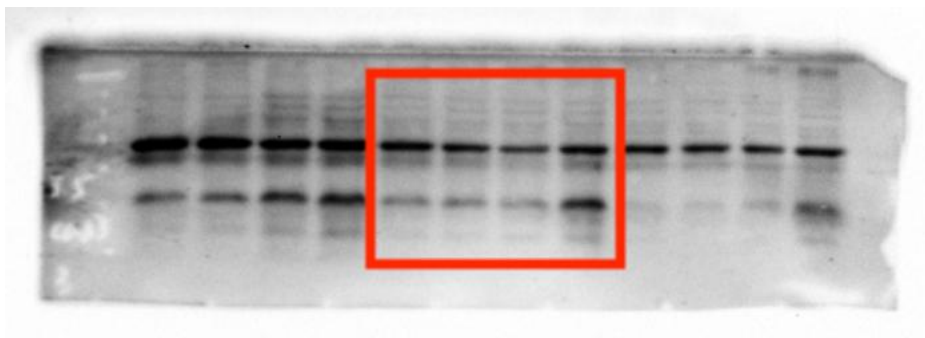

immunoblot of  $\beta$ -Tubulin

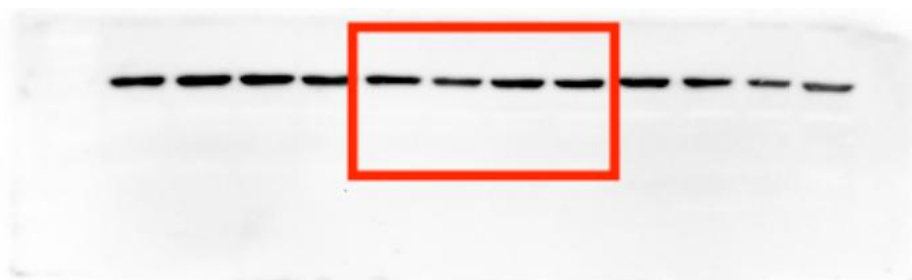

Figure 5B  
immunoblot of GSDME and GSDME-N

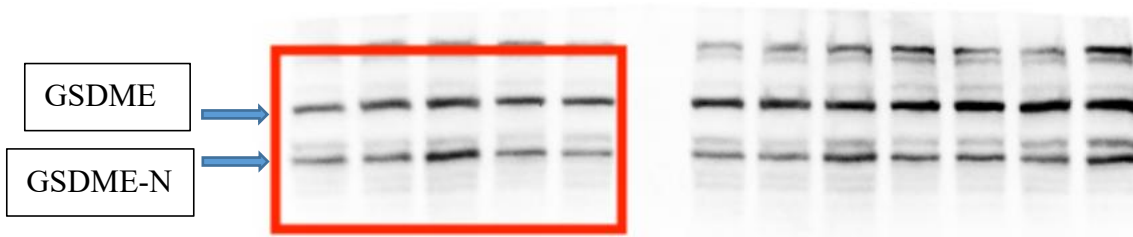

immunoblot of GAPDH of GSDME

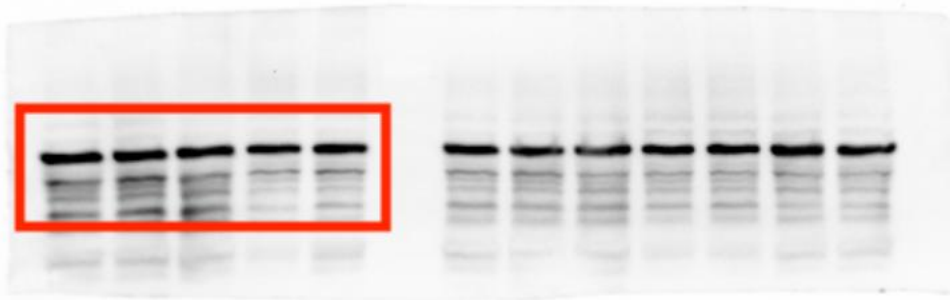

Figure 6A  
immunoblot of GSDME and GSDME-N

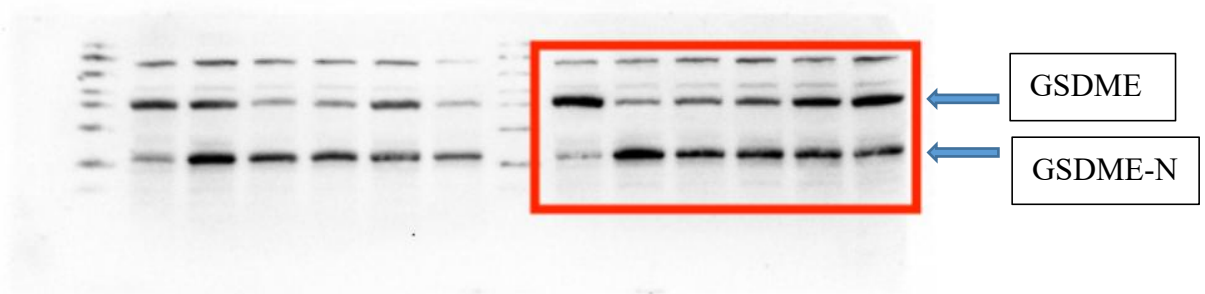

immunoblot of GAPDH

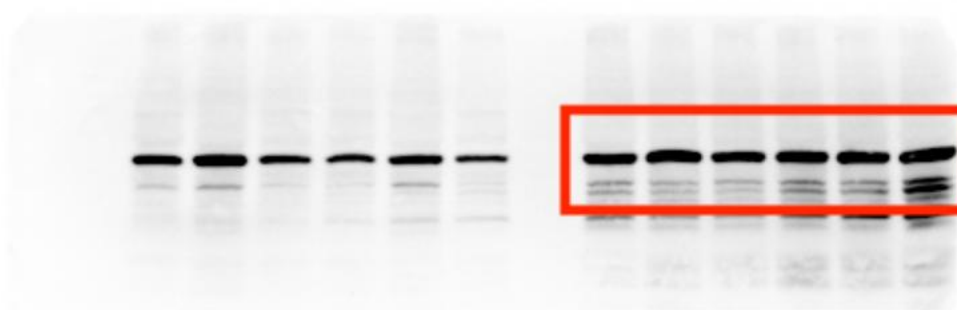

Figure 6B  
immunoblot of GSDME and GSDME-N

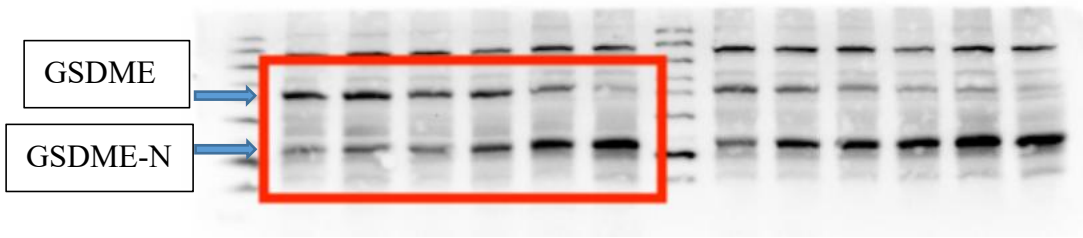

immunoblot of GAPDH

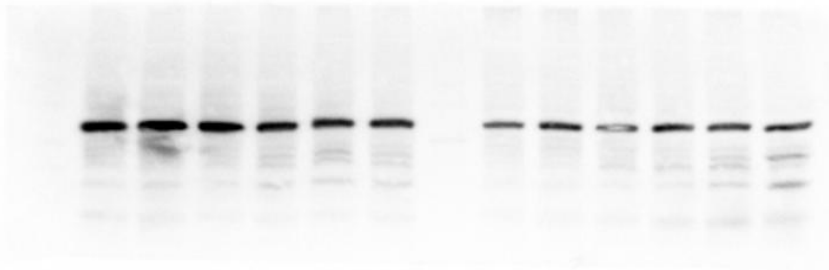

Figure 6C  
immunoblot of GSDME and GSDME-N

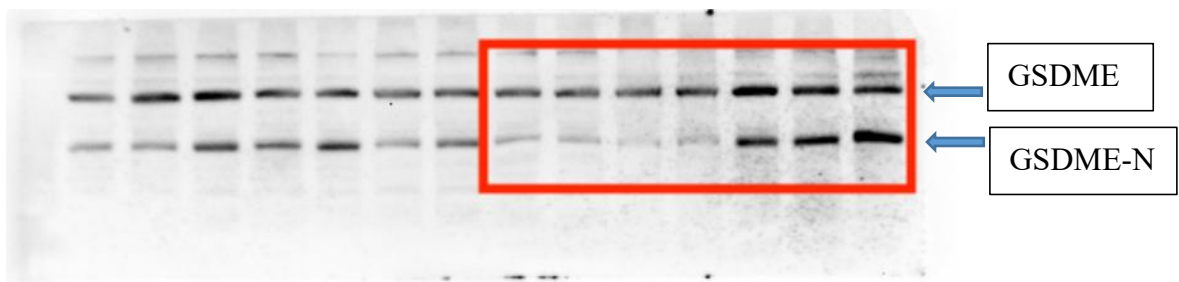

immunoblot of GAPDH

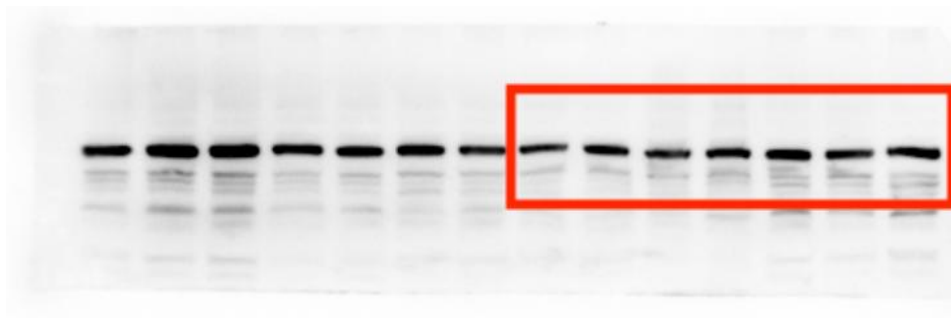



Figure 6D  
immunoblot of GSDME and GSDME-N

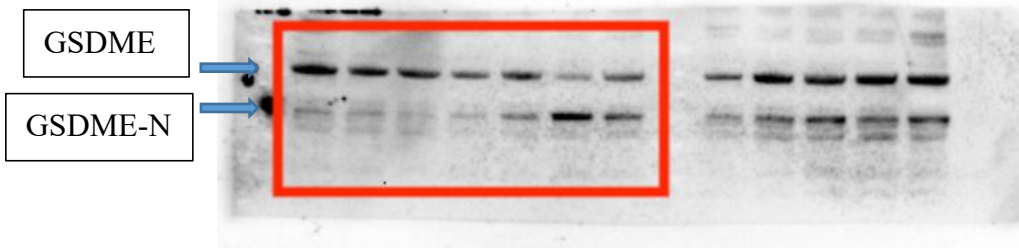

immunoblot of GAPDH of GSDME

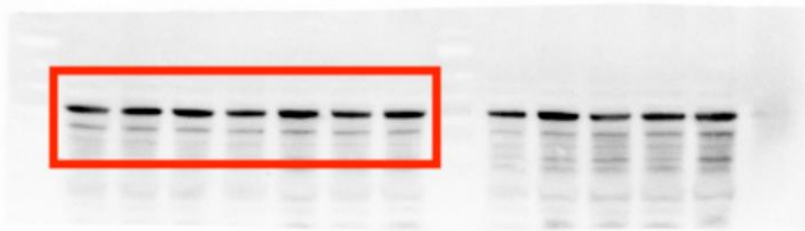

immunoblot of caspase-8 and cleaved-caspase-8

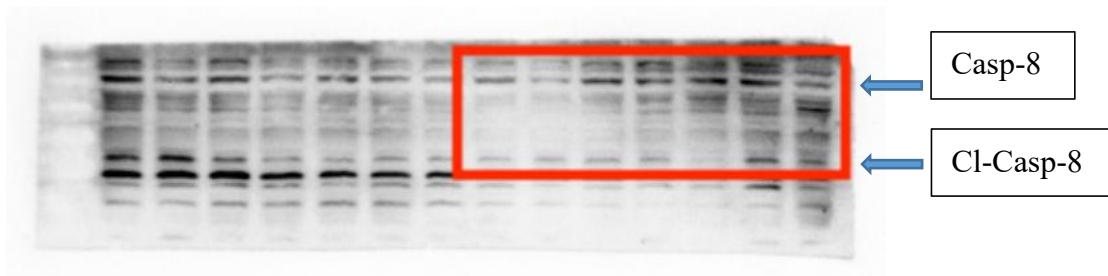

immunoblot of GAPDH of caspase-8

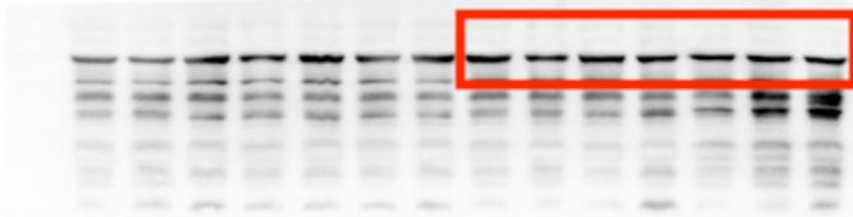

Figure 6F  
immunoblot of GSDME and GSDME-N

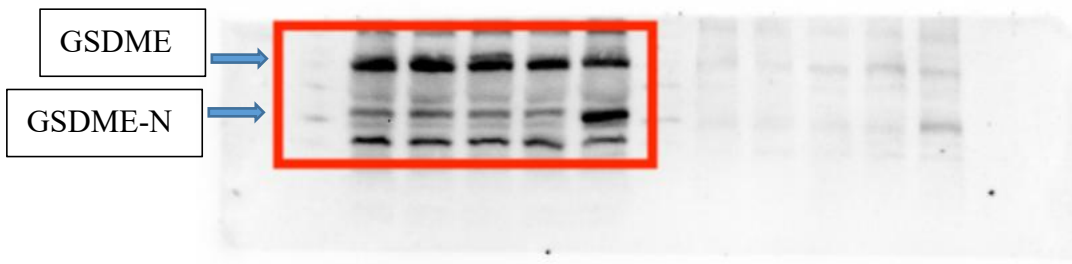

immunoblot of GAPDH of GSDME

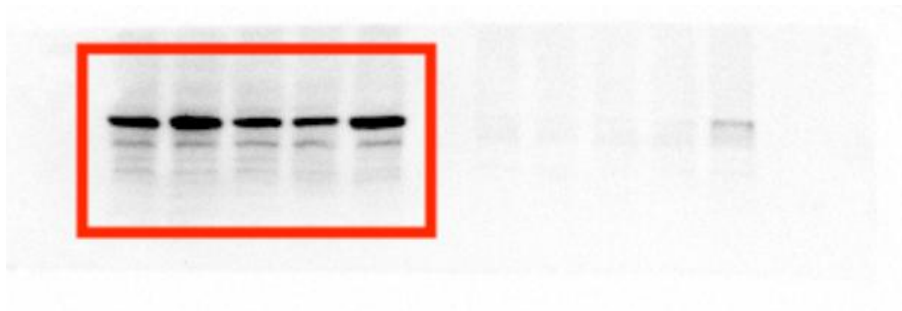

immunoblot of caspase-3 and cleaved-caspase-3

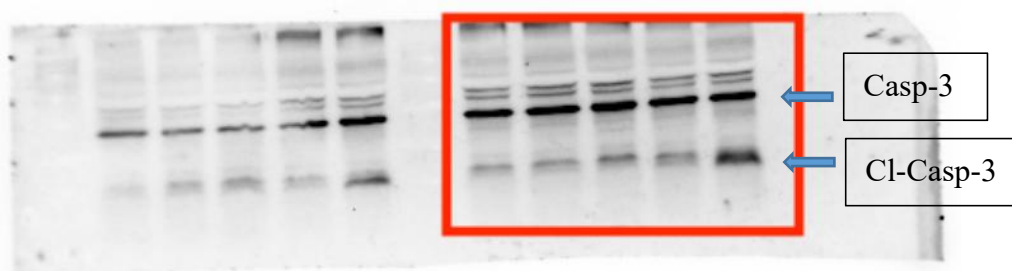

immunoblot of GAPDH of caspase-3

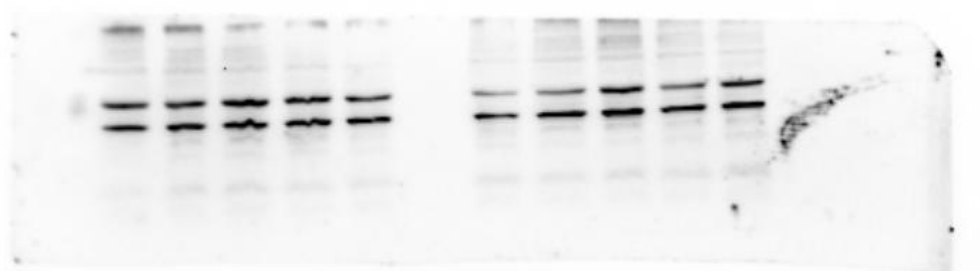

Figure 7A  
immunoblot of MHC1

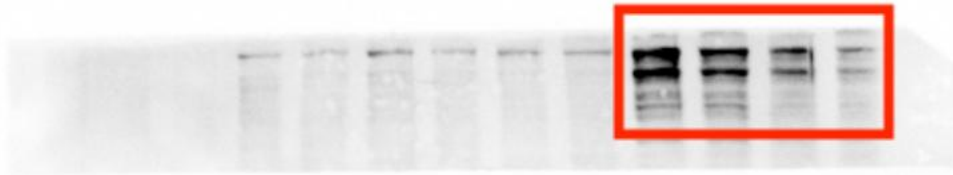

immunoblot of  $\beta$ -Tubulin of MHC1

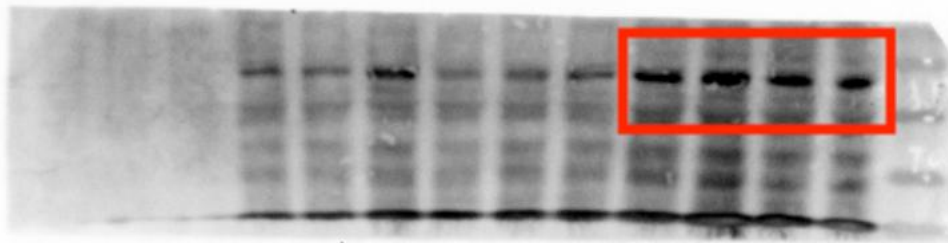

Figure 7B  
immunoblot of MHC1

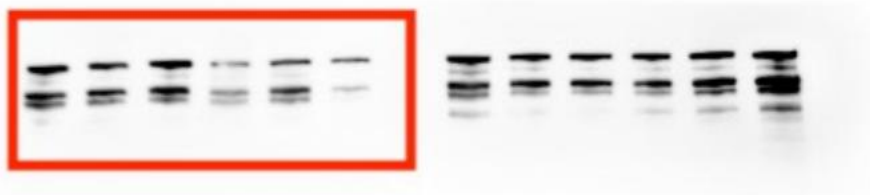

immunoblot of MHC1 and GAPDH

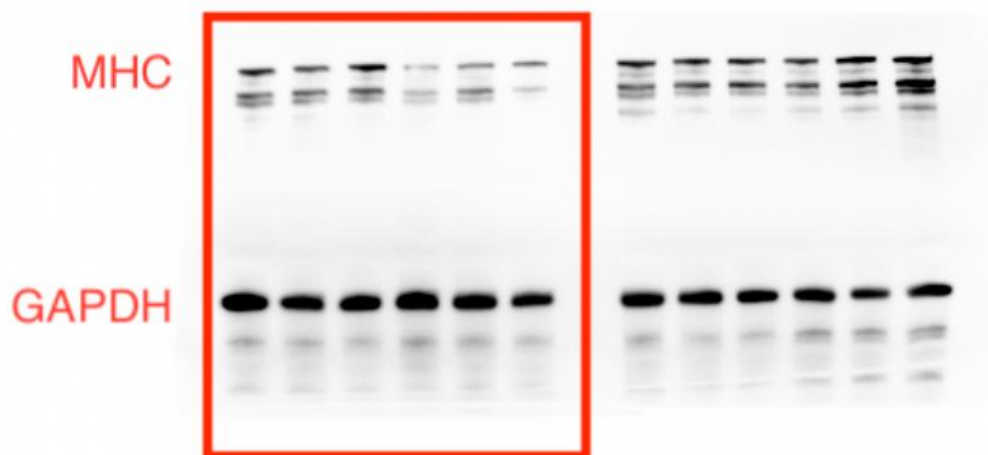

Figure 7C  
immunoblot of MHC1

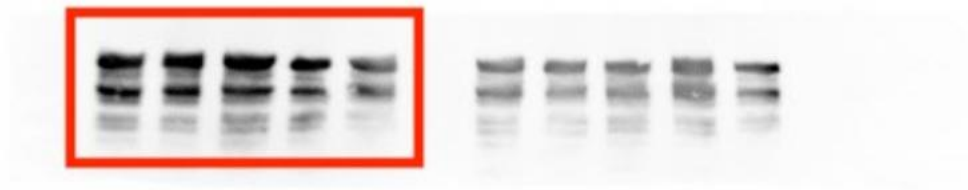

immunoblot of MHC1 and GAPDH

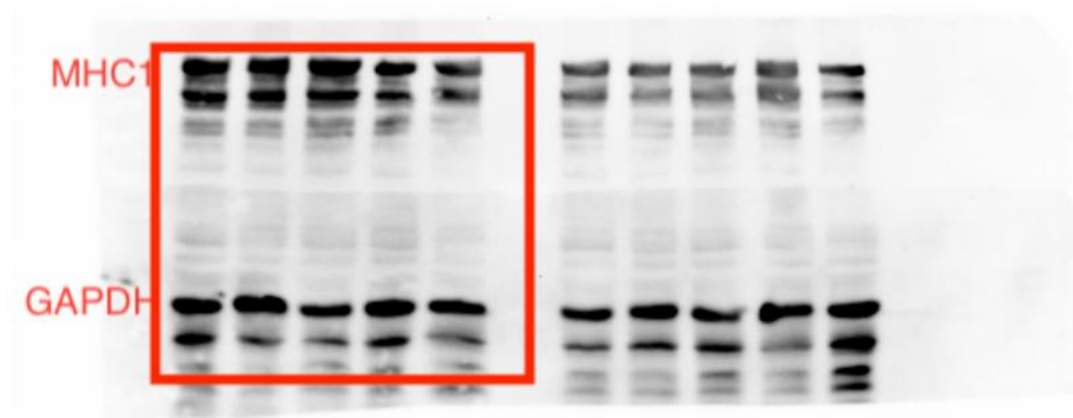

Figure 7D  
immunoblot of MHC1

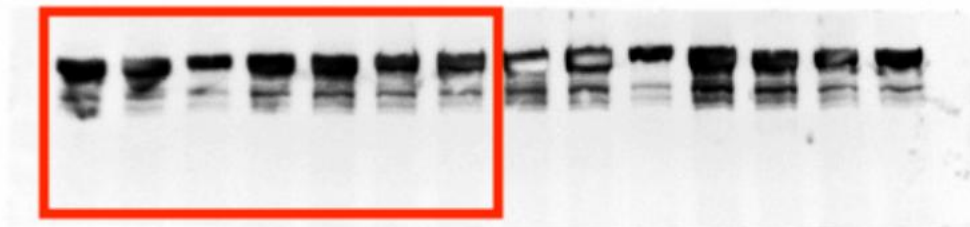

immunoblot of GAPDH

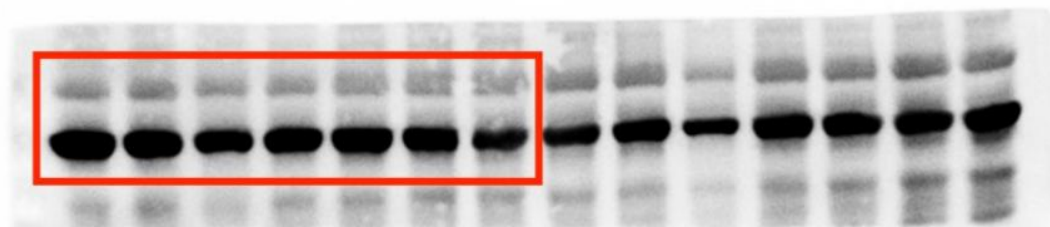

Figure 7E  
immunoblot of MHC1

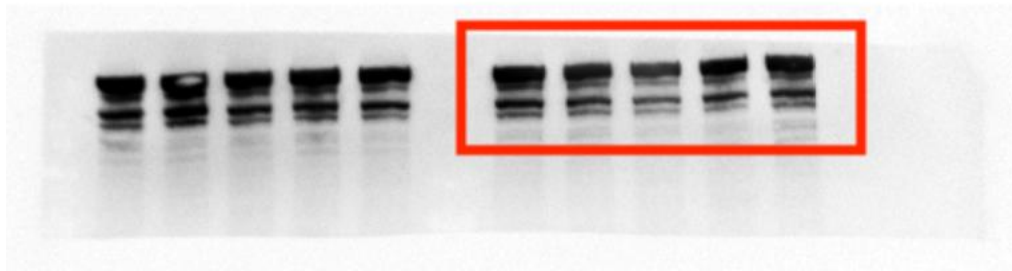

immunoblot of GAPDH

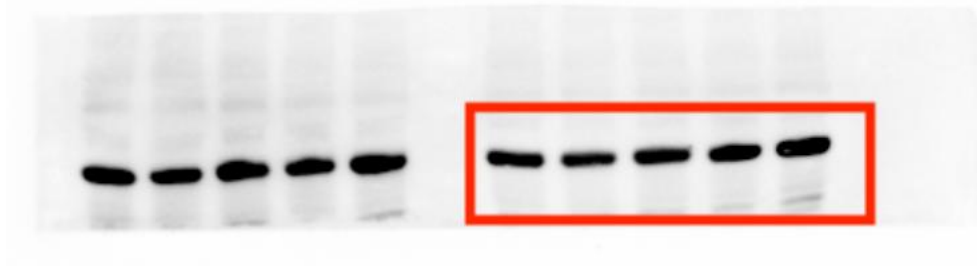

Figure 7F  
immunoblot of GSDME

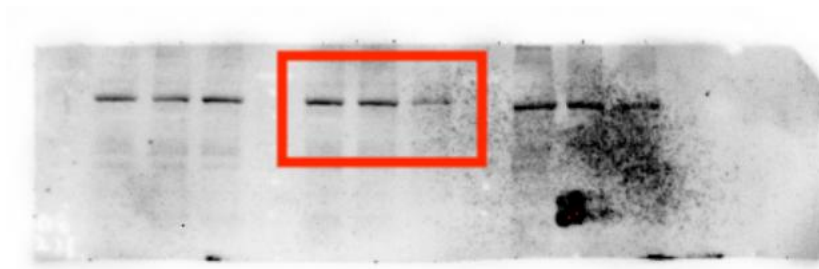

immunoblot of GAPDH

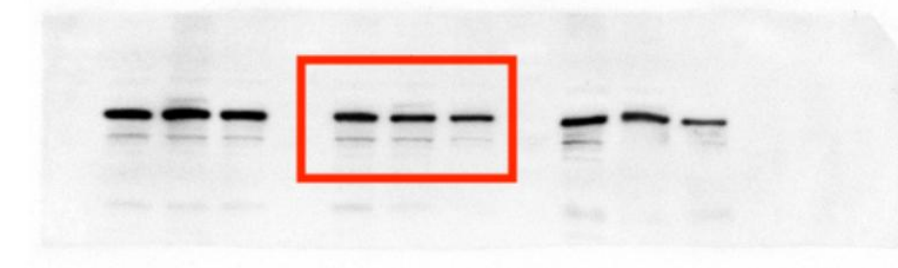

Figure 7H  
immunoblot of GSDME

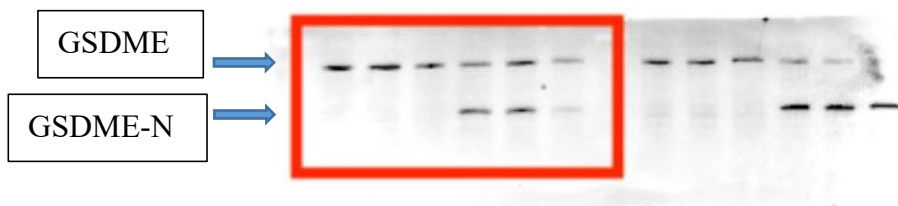

immunoblot of GAPDH

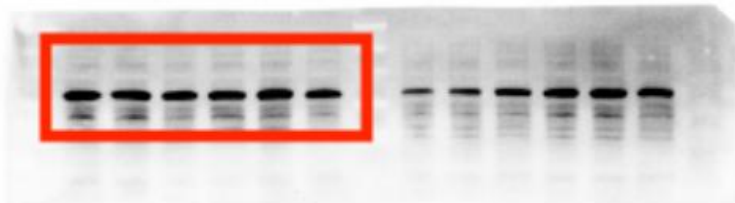

Figure 7I  
immunoblot of MHC1

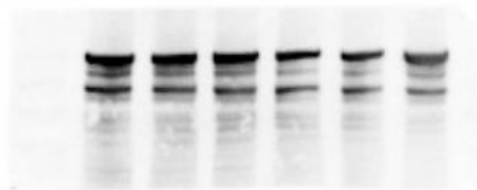

immunoblot of GAPDH

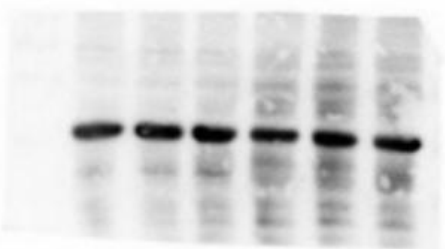

Supplemental figure B  
immunoblot of GSDME

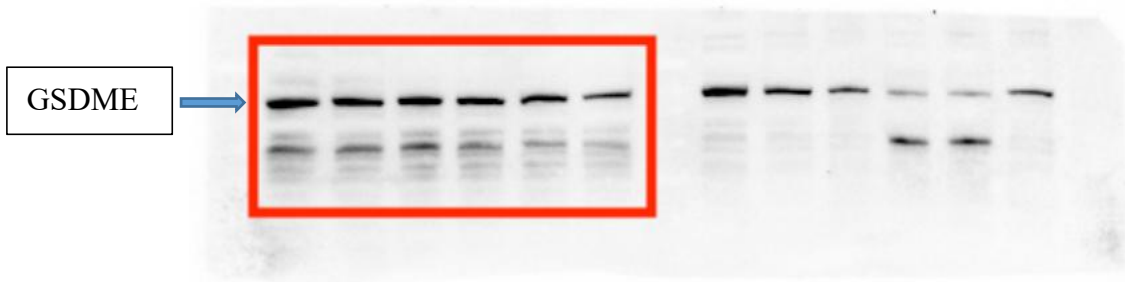

immunoblot of GAPDH

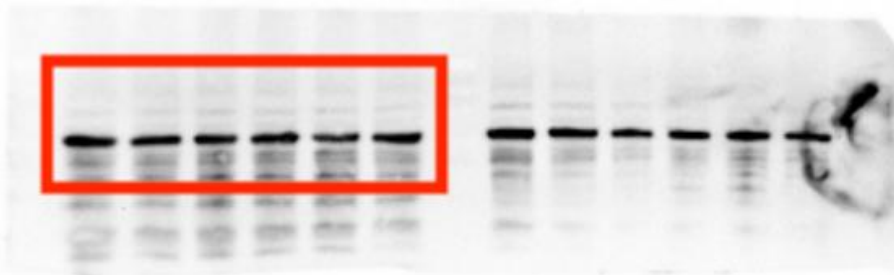

Supplemental figure C  
immunoblot of MHC1

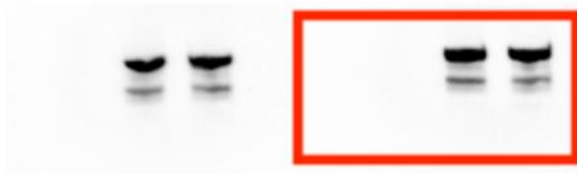

immunoblot of MHC1 and GAPDH

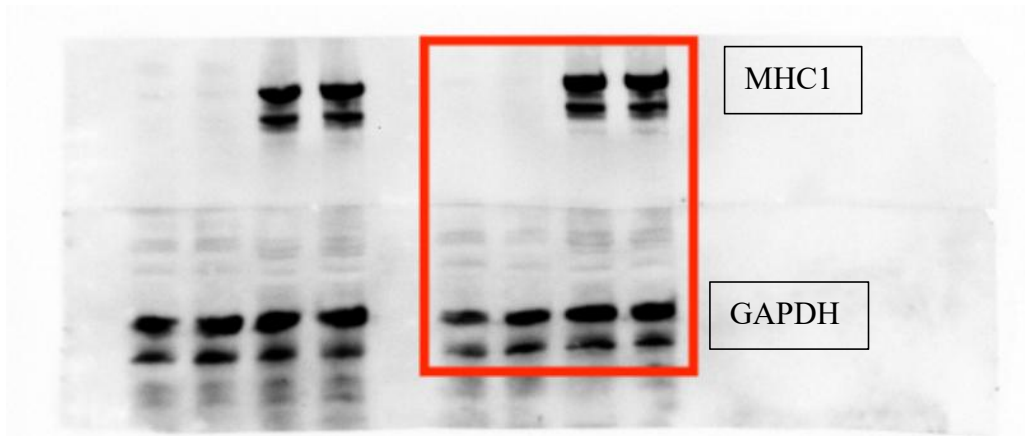

Supplement: 41420_2023_1365_MOESM3_ESM.pdf [file 41420_2023_1365_MOESM3_ESM.pdf]
